# Supplementary material for: Can knowledge of election results change recall of our predictions? Neural correlates of political hindsight bias
Source: PLoS One. 2019 Oct 10;14(10):e0220690. doi: 10.1371/journal.pone.0220690 (PMC6786518; doi:10.1371/journal.pone.0220690)
Supplement: S1 Dataset — (XLSX) [file pone.0220690.s001.xlsx]

## Sheet: 工作表2
Participant #	HB%	HB Size	Left IFG activation (Beta value)
1	0.33	8.5	0.33
2	0.5	5.33	0.32
4	0.17	10	-0.26
5	0.5	5.67	0.22
6	0.33	9	-0.12
7	0.33	7.5	-0.14
10	0.17	10	0.3
11	0	NA
12	0.67	3.5	0.41
13	0.33	2	-0.05
14	0.67	7.5
15	0.33	10	-0.09
16	0.33	3	0.47
18	0.5	3	0.32
19	0.33	6.5	0.19
20	0.5	6.67	0.28
21	0.5	4.67	-0.04
22	0.33	7.5	-0.08
23	0	NA
24	1	4.67
25	0.83	10.8	0.58
26	0.17	30	-0.12
28	0	NA
31	0.33	7	0.47
